# Supplementary material
Source: Springer Nature journal article supplement (https://www.springermedizin.de/resource/supplementary/13256_2013_3109_MOESM4_ESM.pdf/9650528)

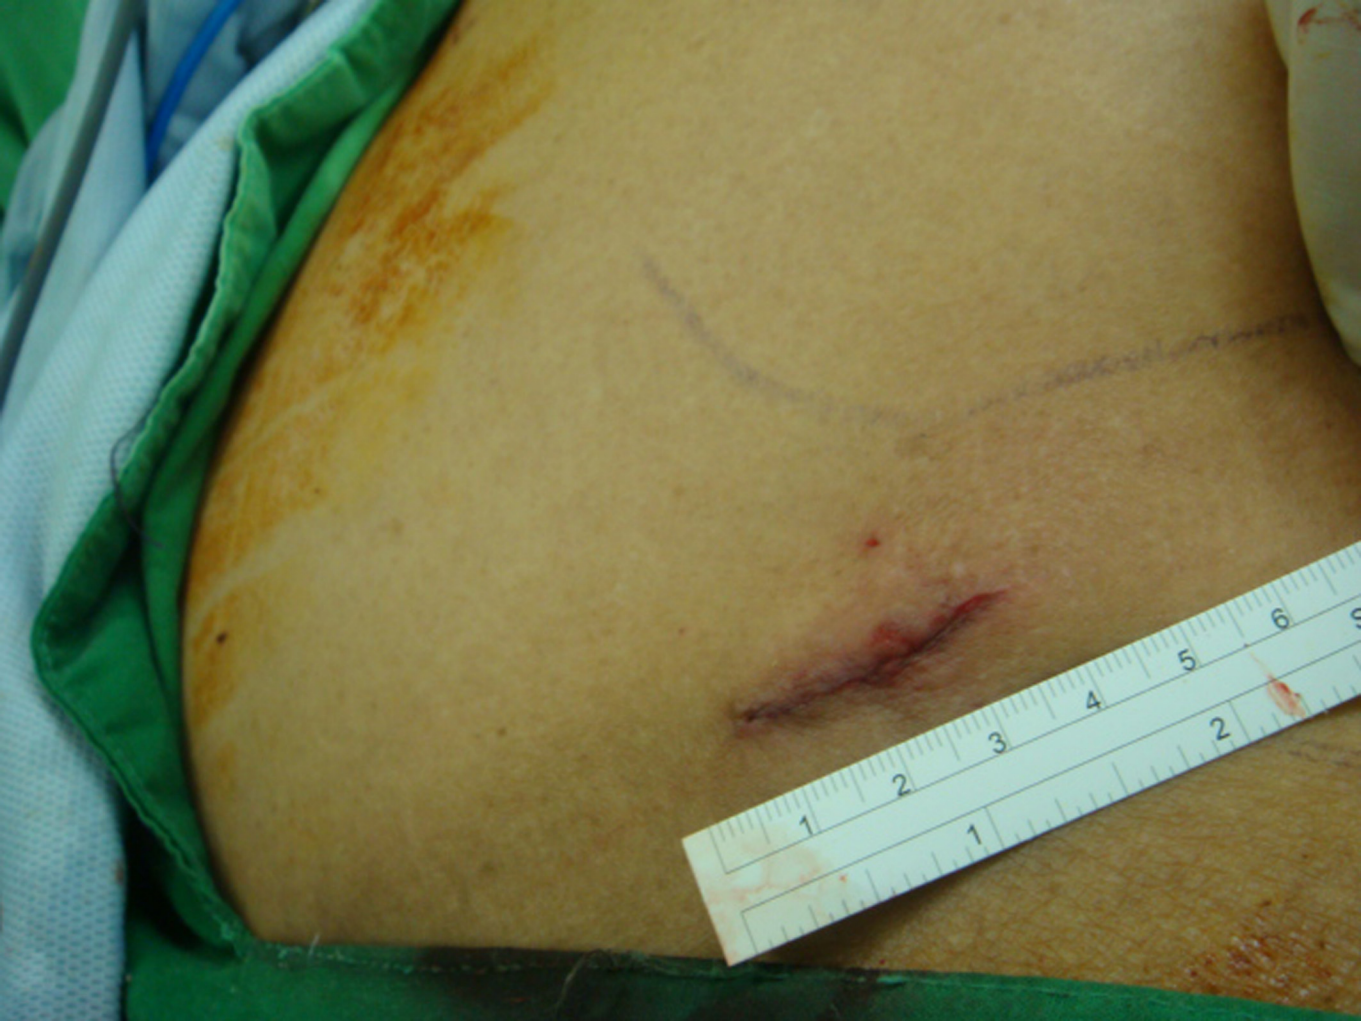

Supplement: MOESM4 [file 9650528]
